# Supplementary material for: Absorption, Distribution, Metabolism, and Excretion of the Novel Helicase-Primase Inhibitor, Amenamevir (ASP2151), in Rodents
Source: PubMed Central journal article supplement — Eur J Drug Metab Pharmacokinet. 2018 May 10;43(6):693–706. doi: 10.1007/s13318-018-0481-y (PMC6244745; doi:10.1007/s13318-018-0481-y), 2018-05-10
Supplement: 13318_2018_481_MOESM1_ESM.pdf [file 13318_2018_481_MOESM1_ESM.pdf]

**Article title**

Absorption, distribution, metabolism, and excretion of the novel helicase-primase inhibitor, amenamevir (ASP2151), in rodents

**Journal name**

European Journal of Drug Metabolism and Pharmacokinetics

**Authors**

Yoshiaki Ohtsu, Yoko Susaki, and Kiyoshi Noguchi

**Corresponding author**

Yoshiaki Ohtsu

Analysis & Pharmacokinetics Research Laboratories, Astellas Pharma Inc.

yoshiaki.ohtsu@zoho.com

**Caption**

Electronic supplementary material 1

Tissue to plasma concentration ratios

**Supplementary Table 1.** Tissue to plasma concentration ratios after single oral administration of  $^{14}\text{C}$ -amenamevir to mice at 3 mg/kg

| Tissue              | Tissue to plasma concentration ratios |      |      |
|---------------------|---------------------------------------|------|------|
|                     | 0.5 h                                 | 1 h  | 4 h  |
| Blood               | 0.9                                   | 0.9  | 0.9  |
| Plasma              | 1.0                                   | 1.0  | 1.0  |
| Brain               | 0.1                                   | 0.1  | 0.1  |
| Spinal cord         | 0.1                                   | 0.1  | 0.1  |
| Hypophysis          | 2.4                                   | 2.2  | 3.1  |
| Eyes                | 0.4                                   | 0.5  | 0.6  |
| Harderian glands    | 5.4                                   | 5.6  | 5.4  |
| Submaxillary glands | 2.3                                   | 2.3  | 2.1  |
| Thyroid gland       | 2.7                                   | 2.1  | 2.0  |
| Thymus              | 1.1                                   | 1.3  | 1.2  |
| Heart               | 2.4                                   | 2.4  | 2.2  |
| Lungs               | 1.9                                   | 1.6  | 1.8  |
| Liver               | 24.9                                  | 20.1 | 21.7 |

---

|                 |      |      |      |
|-----------------|------|------|------|
| Spleen          | 1.5  | 1.4  | 1.5  |
| Pancreas        | 3.2  | 2.9  | 3.0  |
| Adrenals        | 2.1  | 2.4  | 1.8  |
| Kidneys         | 5.3  | 5.0  | 5.3  |
| Epididymides    | 0.9  | 0.9  | 1.6  |
| Testes          | 0.1  | 0.2  | 0.5  |
| Skeletal muscle | 1.1  | 1.1  | 1.1  |
| Skin            | 0.6  | 0.6  | 0.8  |
| Fat             | 0.9  | 1.0  | 1.0  |
| Femur           | 0.2  | 0.3  | 0.2  |
| Urinary bladder | 0.9  | 1.0  | 1.6  |
| Stomach         | 16.0 | 2.5  | 5.0  |
| Small intestine | 15.4 | 15.0 | 10.0 |
| Large intestine | 1.4  | 2.9  | 18.4 |

---

Each value represents the mean of concentration ratios from three animals. Concentration ratios at 24 h were not calculated as the plasma concentrations at 24 h were below the limit of quantitation.
